# Supplementary material for: A Facile Approach for Fabricating Microstructured Surface Based on Etched Template by Inkjet Printing Technology
Source: MDPI journal article supplement (doi:10.3390/polym10111209), 2018-10-31
Supplement: s1 [file s1]

Supporting information

# A Facile Approach for Fabricating Microstructured Surface Based on Etched Template by Inkjet Printing Technology

Jiazhen Sun \*, Chenghu Yun, Bo Cui, Pingping Li, Guangping Liu, Xin Wang and Fuqiang Chu

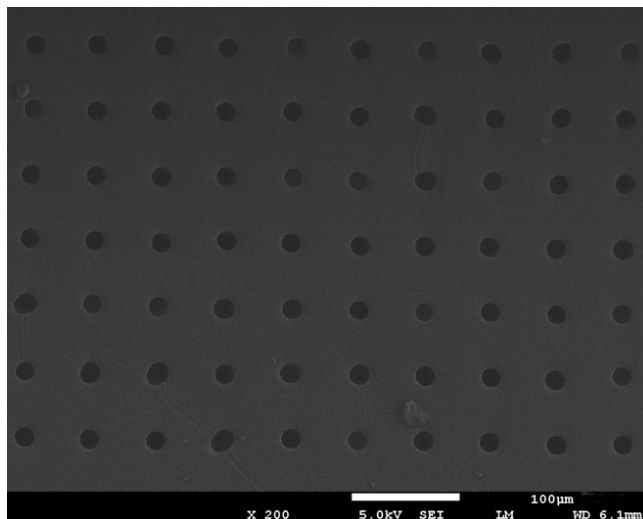

**Figure S1.** SEM image of etched dot template for fabricating microstructured surface with raised dot.

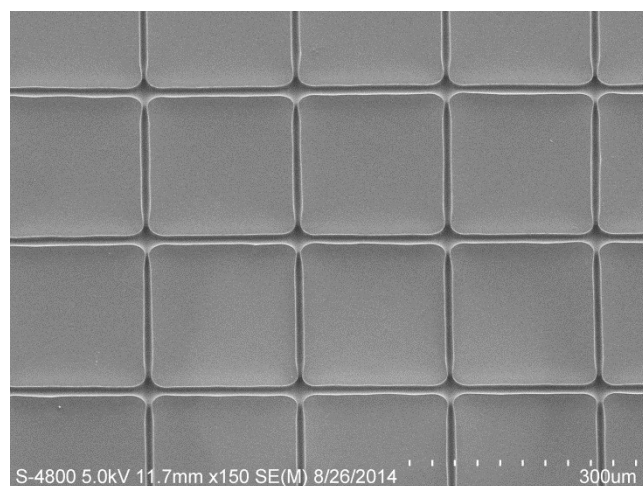

**Figure S2.** SEM image of etched square template for fabricating microstructured surface with raised square.

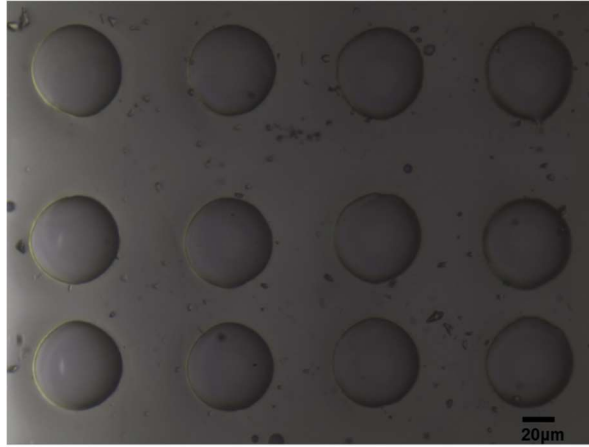

**Figure S3.** Optical image of the high magnification images of raised dot microstructured surface fabricated based on the etched template.

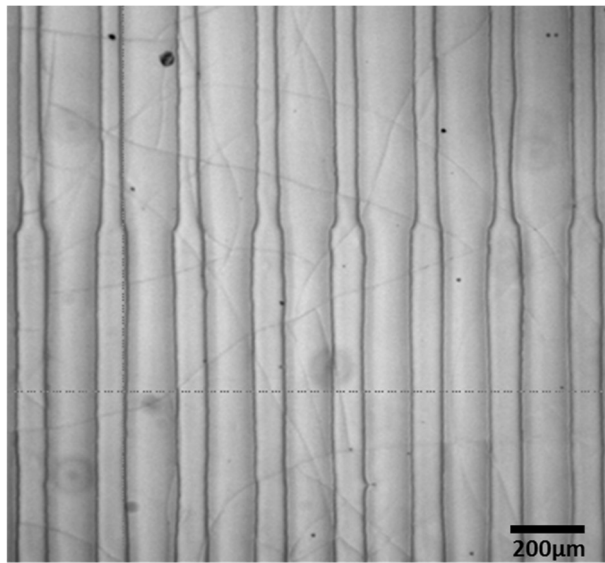

**Figure S4.** Structuring of complicated designs with one gradient microstructure fabricated based on two types of the etched line template.

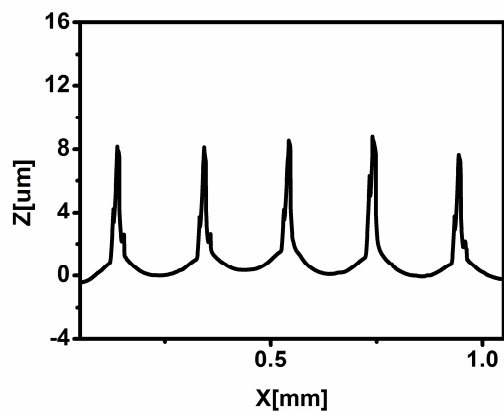

**Figure S5.** Profiles of the raised line microstructured surface fabricated based on the etched template.
